# Supplementary material for: Chemical modeling of the reactivity of short-lived greenhouse gases: a model inter-comparison prescribing a well-measured, remote troposphere
Source: Copernicus journal article supplement (doi:10.5194/amt-2017-470), 2018-02-05
Supplement: Supplementary file 1 [file amt-2017-470-supplement.pdf]

Supporting Material for

**"Chemical modeling of the reactivity of short-lived greenhouse gases: a model inter-comparison prescribing a well-measured, remote troposphere"**

by Prather et al., 2017

This work focuses on the reactivity of tropospheric air parcels, adopting a unique protocol to test the photochemical modules of the 3-D models, including regional-to-global chemistry-transport models, chemistry climate models, and Earth system models. The protocol was designed to enable 3-D models to ingest a stream of 1 s to 10 s (0.2 - 2 km) in situ detailed chemistry measurements from an aircraft campaign. The protocol embeds these parcels in a unique, appropriate grid cell of each model, turns off processes that mix adjacent grid cells, and integrates the 3-D model for 24 hours. The photochemical module is thus dependent only on the chemical mechanism and the diurnal cycle of photolysis rates, which are driven in turn by temperature, water vapor, solar zenith angle, clouds, possibly aerosols and overhead ozone, which are calculated as they would be in each model. This is based on the A-runs of the 3-D models demonstrated in Prather et al. (2017, hence P2017)

***Reactivities***

The definition of reactivity and the chemical rates used to evaluate them are based on the ACP paper that began this approach (P2017). Reactivity is defined here as the 24-hour average rate of important compounds, which here are production and loss of tropospheric ozone and methane.

Loss of CH<sub>4</sub> (L-CH<sub>4</sub>, ppb/day) is calculated from the OH reaction in the troposphere (Cl reactions are not included because the species needed to define them are not readily measured) :

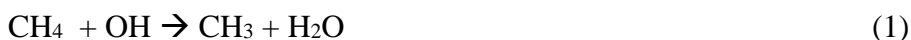

Production of O<sub>3</sub> (P-O<sub>3</sub>, ppb.day) is calculated from the peroxy radical reactions with NO as well as photolysis of O<sub>2</sub> in the upper tropical troposphere (mostly above 12 km, so not relevant for DC-8 aircraft measurements):

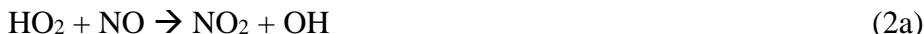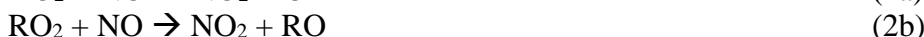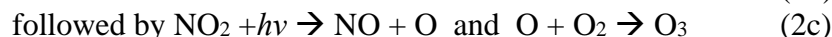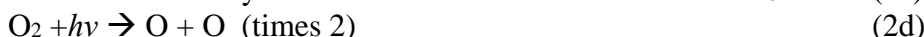

Loss of O<sub>3</sub> (L-O<sub>3</sub>, ppb/day) is based on three reactions with HO<sub>x</sub> radicals or water:

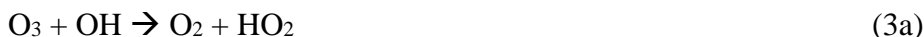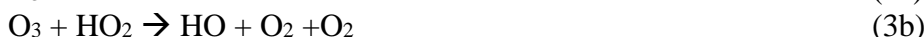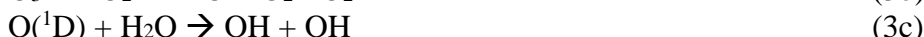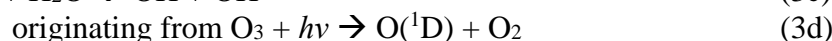

In highly polluted conditions there are additional reactions involving nitrate compounds or direct reaction with alkenes or isoprene that lead to O<sub>3</sub> loss. These diagnostics were designed for the remote troposphere and are adequate for calculating the true P-O<sub>3</sub> and L-O<sub>3</sub>. In tests with the A-runs (P2017), the diagnosed P-O<sub>3</sub> minus L-O<sub>3</sub> matched the 24-hour change in O<sub>3</sub>.

### ***Protocol***

The data stream includes key species determining tropospheric chemistry that need to be initialized in the 3-D models: O<sub>3</sub>, NO<sub>x</sub> (=NO+NO<sub>2</sub>), HNO<sub>3</sub>, HNO<sub>4</sub>, PAN (peroxyacetyl nitrate), RNO<sub>3</sub> (CH<sub>3</sub>NO<sub>3</sub> and all alkyl nitrates), HOOH, ROOH (CH<sub>3</sub>OOH and smaller contribution from C<sub>2</sub>H<sub>5</sub>OOH), HCHO, CH<sub>3</sub>CHO (acetaldehyde), C<sub>3</sub>H<sub>6</sub>O (acetone), CO, CH<sub>4</sub>, C<sub>2</sub>H<sub>6</sub>, alkanes (all C<sub>3</sub>H<sub>8</sub> and higher), alkenes (all C<sub>2</sub>H<sub>4</sub> and higher), aromatics (benzene, toluene, xylene), C<sub>5</sub>H<sub>8</sub> (isoprene plus terpenes), plus temperature (T) and specific humidity (q). When a specified species includes a collective (e.g., NO<sub>x</sub>, aromatics) each model can partition that collective total mole fraction in similar proportions to those as calculated in the model.

This synthetic data stream is taken from an earlier UCI model version running at high resolution (~0.55 degrees horizontal, and ~0.5 km vertical). All the model grid cells from 0.5 to 12 km from 60S to 60N along 3 adjacent meridians at 180W were used (14,880 parcels). The choice of dropping points below 0.5 km was made earlier to avoid the highly polluted boundary layer over land sources, but when the experiment chose to focus on the middle Pacific, this exclusion was no longer necessary. The protocol was already in process and some model results completed, so the altitude cut off was left. It will clearly not be used with the ATom measurement data stream (ATom, 2017) in subsequent papers since there is extensive data from the marine boundary layer taken at 0.16 km altitude. No attempt was made to follow ATom-like profiling. The overall set of 14880 points from 60S to 60N in the data stream presents a dense climatology and tests the ability of the 3-D models to treat fine-resolution data.

Each data stream record includes latitude, longitude, and pressure, which are used to assign the closest model grid cell to each simulated air parcel. The model's restart file for one of the 5 days in August (8/01, 8/06, 8/11, 8/16, 8/21) is overwritten with the simulated chemical species at the appropriate grid cell. When two parcels fall within the same grid cell, an algorithm shifts the longitude of the second parcel to a nearby cell. Each model runs this restart file for 1 day using the A-run protocol, which keeps all air parcels isolated with little influence from neighboring grid cells. (These neighbor cells may be either from the simulated data or the original restart file.) The use of such modified restart files allows for ready calculation of the reactivities in global models as per the A-runs of P2017.

In the analysis here, each of the data stream parcels is weighted equally to simplify this analysis; but for an observed data stream, each parcel must be weighted separately to ensure uniform sampling of tropospheric mass, particularly the profiles.

### ***Less useful diagnostics and problems with the protocol***

The slope of parcel reactivities relative to the reference case indicates bias that changes from low to high reactivity and may be useful in diagnosing the chemical models. Most of the slopes in

Table S3 lie within  $1 \pm 0.08$  (bold text), and these combinations have mostly been identified earlier. The slope does identify a disagreement across the reference-case models: for J-NO<sub>2</sub>, GSFC 's slope is 0.91 while UCI's is 1.13; these biases are symmetric because both have averaged with HARV (slope = 0.97) to get the reference case.

Correlation coefficients of parcels for model pairs are also calculated (not shown); but these are all large, usually 0.9 or greater; and do not provide any insight on model differences. There are large differences in reactivities associated with latitude (sun angle and length of day) and with pressure, and the models reproduce these first-order effects.

The GFDL and NCAR CCMs could not maintain the fixed, data-stream T&q values over the 24-hour integration, which leads to larger rms differences because reactivities depend on both T and especially q. This explains in part why the GFDL and NCAR models in Figure 2 have larger scatter for reactivities than the other non-GISS models, but similar scatter in J values. This effect may also contribute to the larger day-to-day rms, for NCAR at least, and is examined more extensively with the UCI CTM running with the T&q's from both models (Section 3.5).

### ***References***

- ATom: Measurements and modeling results from the NASA Atmospheric Tomography Mission, <https://espoarchive.nasa.gov/archive/browse/atom>, doi: 10.5067/Aircraft/ATom/TraceGas\_Aerosol\_Global\_Distribution, 2017.
- Prather, M. J., Zhu, X., Flynn, C. M., Strode, S. A., Rodriguez, J. M., Steenrod, S. D., Liu, J. H., Lamarque, J. F., Fiore, A. M., Horowitz, L. W., Mao, J. Q., Murray, L. T., Shindell, D. T., and Wofsy, S. C.: Global atmospheric chemistry - which air matters, *Atmos Chem Phys*, 17, 9081-9102, 10.5194/acp-17-9081-2017, 2017.

| model |           | year & days simulated | updates, references                                                                                                           | email                     |
|-------|-----------|-----------------------|-------------------------------------------------------------------------------------------------------------------------------|---------------------------|
| GFDL  | AM3       | 2013 Aug 1-6-11-16-21 | Horowitz et al., 2003; Li, Mao et al., 2017                                                                                   | amfiore@ldeo.columbia.edu |
| GISS  | GISS-E2.1 | 2013 Aug 1-6-11-16-21 | Updated code base to E2.1 and switched to nudging to MERRA [Rienecker et al., 2011]                                           | lee.murray@rochester.edu  |
| GSFC  | GMI-CTM   | 2016 Aug 1-6-11-16-21 | None                                                                                                                          | Sarah.A.Strode@nasa.gov   |
| GC    | GEOS-Chem | 2013 Aug 1-6-11-16-21 | v11_01 ( <a href="http://www.geos-chem.org">http://www.geos-chem.org</a> ) and using MERRA-2 reanalysis [Gelaro et al., 2017] | lee.murray@rochester.edu  |
| NCAR  | CAM4-Chem | 2008 Aug 2-6-11-16-21 | Tilmes et al., 2016                                                                                                           | lamar@ucar.edu            |
| UCI   | UCI-CTM   | 2016 Aug 1-6-11-16-21 | Includes aerosol impacts on J and k (v72d), run with observed O <sub>3</sub> climatology                                      | mprather@uci.edu          |

|      | Chemical Mechanism                                                                                                    | Photolysis rates                                |
|------|-----------------------------------------------------------------------------------------------------------------------|-------------------------------------------------|
| GFDL | MOZART-2                                                                                                              | Fast-J                                          |
| GISS | CBM-4/RACM (Houweling et al., 1998; Shindell et al., 2013). No aromatics.                                             | Fast-J2                                         |
| GSFC | Combo Strat-Trop; Trop from GEOS-Chem                                                                                 | Fast-JX                                         |
| GC   | GEOS-Chem ( <a href="http://www.geos-chem.org">http://www.geos-chem.org</a> ) v11_01 “standard” mechanism. No MeONO2. | Fast-JX v7.0                                    |
| NCAR | MOZART v4                                                                                                             | TUV lookup tables                               |
| UCI  | ASAD (Wild, FRSGC), 24 species + Linoz v3                                                                             | Cloud-J v7.5, full cloud treatment, Fast-J core |

| model  | GFDL                      | GISS | GSFC        | GC          | NCAR        | UCI         | U2015       | U1997       |
|--------|---------------------------|------|-------------|-------------|-------------|-------------|-------------|-------------|
| /model | <b>P-O3 = 0.79 ppb/d</b>  |      |             |             |             |             |             |             |
| GFDL   | 0                         | 0.87 | <b>0.19</b> | <b>0.15</b> | <b>0.15</b> | <b>0.16</b> | 0.15        | 0.16        |
| GISS   |                           | 0    | 0.90        | 0.83        | 0.81        | 0.80        | 0.80        | 0.79        |
| GSFC   |                           |      | 0           | <b>0.17</b> | 0.24        | <b>0.19</b> | 0.20        | 0.20        |
| GC     |                           |      |             | 0           | <b>0.17</b> | <b>0.10</b> | 0.11        | 0.11        |
| NCAR   |                           |      |             |             | 0           | <b>0.15</b> | 0.14        | 0.14        |
| UCI    |                           |      |             |             |             | 0           | <b>0.06</b> | <b>0.06</b> |
| U2015  |                           |      |             |             |             |             | 0           | <b>0.06</b> |
| U1997  |                           |      |             |             |             |             |             | 0           |
|        | <b>L-O3 = 1.45 ppb/d</b>  |      |             |             |             |             |             |             |
| GFDL   | 0                         | 1.86 | 0.88        | 0.86        | 0.92        | 0.96        | 0.97        | 0.98        |
| GISS   |                           | 0    | 1.06        | 1.06        | 1.26        | 1.02        | 1.01        | 1.02        |
| GSFC   |                           |      | 0           | <b>0.20</b> | 0.67        | <b>0.21</b> | 0.24        | 0.25        |
| GC     |                           |      |             | 0           | 0.59        | <b>0.22</b> | 0.24        | 0.26        |
| NCAR   |                           |      |             |             | 0           | 0.68        | 0.71        | 0.71        |
| UCI    |                           |      |             |             |             | 0           | <b>0.12</b> | <b>0.12</b> |
| U2015  |                           |      |             |             |             |             | 0           | <b>0.13</b> |
| U1997  |                           |      |             |             |             |             |             | 0           |
|        | <b>L-CH4 = 0.63 ppb/d</b> |      |             |             |             |             |             |             |
| GFDL   | 0                         | 0.38 | 0.23        | 0.22        | 0.20        | 0.26        | 0.27        | 0.27        |

|                              |      |      |             |             |             |             |             |             |
|------------------------------|------|------|-------------|-------------|-------------|-------------|-------------|-------------|
| GISS                         |      | 0    | 0.42        | 0.44        | 0.47        | 0.44        | 0.45        | 0.45        |
| GSFC                         |      |      | 0           | <b>0.09</b> | 0.25        | <b>0.10</b> | 0.12        | 0.12        |
| GC                           |      |      |             | 0           | 0.22        | <b>0.09</b> | 0.10        | 0.11        |
| NCAR                         |      |      |             |             | 0           | 0.25        | 0.26        | 0.26        |
| UCI                          |      |      |             |             |             | 0           | <b>0.06</b> | <b>0.06</b> |
| U2015                        |      |      |             |             |             |             | 0           | <b>0.06</b> |
| U1997                        |      |      |             |             |             |             |             | 0           |
| <b>J-NO2 = 4.45 (e-3 /s)</b> |      |      |             |             |             |             |             |             |
| GFDL                         | 0    | 1.14 | <b>0.43</b> | <b>0.42</b> | <b>0.58</b> | 0.71        | 0.72        | 0.74        |
| GISS                         |      | 0    | 1.11        | 1.02        | 0.96        | 0.78        | 0.82        | 0.80        |
| GSFC                         |      |      | 0           | <b>0.37</b> | <b>0.55</b> | <b>0.65</b> | 0.71        | 0.72        |
| GC                           |      |      |             | 0           | <b>0.51</b> | <b>0.56</b> | 0.60        | 0.63        |
| NCAR                         |      |      |             |             | 0           | <b>0.62</b> | 0.62        | 0.65        |
| UCI                          |      |      |             |             |             | 0           | <b>0.33</b> | <b>0.33</b> |
| U2015                        |      |      |             |             |             |             | 0           | <b>0.34</b> |
| U1997                        |      |      |             |             |             |             |             | 0           |
| <b>J-O1D = 1.19 (e-5 /s)</b> |      |      |             |             |             |             |             |             |
| GFDL                         | 0    | 1.07 | <b>0.15</b> | <b>0.15</b> | 0.25        | <b>0.17</b> | 0.17        | 0.18        |
| GISS                         |      | 0    | 1.06        | 1.09        | 0.94        | 1.02        | 1.02        | 1.01        |
| GSFC                         |      |      | 0           | <b>0.12</b> | 0.24        | <b>0.13</b> | 0.15        | 0.16        |
| GC                           |      |      |             | 0           | 0.29        | <b>0.17</b> | 0.17        | 0.18        |
| NCAR                         |      |      |             |             | 0           | 0.24        | 0.24        | 0.24        |
| UCI                          |      |      |             |             |             | 0           | <b>0.08</b> | <b>0.08</b> |
| U2015                        |      |      |             |             |             |             | 0           | <b>0.08</b> |
| U1997                        |      |      |             |             |             |             |             | 0           |
|                              | GFDL | GISS | GSFC        | GC          | NCAR        | UCI         | U2015       | U1997       |

| <b>Table S3.</b> Slope of each model vs. ref model (5d means) |             |             |             |             |             |
|---------------------------------------------------------------|-------------|-------------|-------------|-------------|-------------|
| model                                                         | P-O3        | L-O3        | L-CH4       | J-NO2       | J-O1D       |
| GFDL                                                          | 0.96        | <b>0.61</b> | 0.81        | 0.93        | 0.92        |
| GISS                                                          | <b>1.57</b> | <b>1.46</b> | <b>0.32</b> | 1.05        | <b>1.43</b> |
| GSFC                                                          | 0.88        | 0.99        | 0.98        | 0.91        | 1.00        |
| GC                                                            | 1.04        | 0.99        | 1.01        | 0.96        | 0.97        |
| NCAR                                                          | 1.03        | 0.90        | 0.93        | 0.95        | 1.10        |
| UCI                                                           | 1.08        | 1.01        | 1.02        | 1.13        | 1.03        |
| <i>U2015</i>                                                  | <i>1.08</i> | <i>1.02</i> | <i>1.03</i> | <i>1.12</i> | <i>1.03</i> |
| <i>U1997</i>                                                  | <i>1.08</i> | <i>1.03</i> | <i>1.03</i> | <i>1.15</i> | <i>1.04</i> |

Slopes outside of 1±0.2 are **boldened**. Alternate UCI years are in *italics*.

| <b>Table S4.</b> Slopes for each day vs. 5d mean for individual models |        |        |        |        |        |
|------------------------------------------------------------------------|--------|--------|--------|--------|--------|
| all models                                                             | P-O3   | L-O3   | L-CH4  | J-NO2  | J-O1D  |
| mean ± sd                                                              | 1±0.03 | 1±0.04 | 1±0.04 | 1±0.09 | 1±0.02 |
| begin: 8/01                                                            | 1.01   | 1.01   | 1.01   | 1.12   | 1.02   |
| end: 8/21                                                              | 0.97   | 0.96   | 0.96   | 0.87   | 0.97   |

| <b>Table S5.</b> Percent of total integrated reactivity in top X% of parcels |    |     |     |     |
|------------------------------------------------------------------------------|----|-----|-----|-----|
| P-O3                                                                         | 5% | 10% | 25% | 50% |
| GFDL                                                                         | 15 | 27  | 53  | 81  |

|              |           |           |           |           |
|--------------|-----------|-----------|-----------|-----------|
| GISS         | 14        | 25        | 51        | 80        |
| GSFC         | 14        | 25        | 50        | 79        |
| GC           | 15        | 26        | 53        | 82        |
| NCAR         | 14        | 26        | 53        | 82        |
| UCI          | 15        | 26        | 53        | 82        |
| <i>U2015</i> | <i>15</i> | <i>26</i> | <i>53</i> | <i>82</i> |
| <i>U1997</i> | <i>15</i> | <i>26</i> | <i>53</i> | <i>82</i> |
| L-O3         | 5%        | 10%       | 25%       | 50%       |
| GFDL         | 21        | 37        | 69        | 93        |
| GISS         | 14        | 26        | 53        | 82        |
| GSFC         | 14        | 26        | 54        | 84        |
| GC           | 14        | 26        | 53        | 83        |
| NCAR         | 17        | 30        | 57        | 84        |
| UCI          | 15        | 26        | 54        | 83        |
| <i>U2015</i> | <i>15</i> | <i>27</i> | <i>54</i> | <i>84</i> |
| <i>U1997</i> | <i>15</i> | <i>27</i> | <i>54</i> | <i>84</i> |
| L-CH4        | 5%        | 10%       | 25%       | 50%       |
| GFDL         | 16        | 29        | 57        | 83        |
| GISS         | 11        | 20        | 43        | 72        |
| GSFC         | 14        | 26        | 55        | 84        |
| GC           | 14        | 26        | 54        | 84        |
| NCAR         | 16        | 28        | 57        | 85        |
| UCI          | 14        | 26        | 54        | 84        |
| <i>U2015</i> | <i>14</i> | <i>26</i> | <i>54</i> | <i>84</i> |
| <i>U1997</i> | <i>14</i> | <i>26</i> | <i>55</i> | <i>84</i> |

| <b>Table S6. % of total R in top X% of parcels in UCI</b> |    |     |     |     |
|-----------------------------------------------------------|----|-----|-----|-----|
| P-O3                                                      | 5% | 10% | 25% | 50% |
| 1-Aug                                                     | 15 | 27  | 54  | 83  |
| 6-Aug                                                     | 15 | 27  | 54  | 83  |
| 11-Aug                                                    | 15 | 27  | 54  | 82  |
| 16-Aug                                                    | 14 | 26  | 52  | 81  |
| 21-Aug                                                    | 14 | 26  | 52  | 80  |
| L-O3                                                      | 5% | 10% | 25% | 50% |
| 1-Aug                                                     | 15 | 27  | 55  | 85  |
| 6-Aug                                                     | 15 | 27  | 55  | 85  |
| 11-Aug                                                    | 15 | 27  | 54  | 83  |
| 16-Aug                                                    | 15 | 26  | 54  | 83  |
| 21-Aug                                                    | 14 | 26  | 52  | 82  |
| L-CH4                                                     | 5% | 10% | 25% | 50% |
| 1-Aug                                                     | 15 | 27  | 56  | 85  |
| 6-Aug                                                     | 15 | 27  | 56  | 85  |
| 11-Aug                                                    | 14 | 26  | 55  | 84  |
| 16-Aug                                                    | 14 | 26  | 54  | 83  |
| 21-Aug                                                    | 14 | 25  | 53  | 83  |

| <b>Table S7. Overlap (%) of the top X% of Rs vs reference case, all 5d means</b> |      |      |       |
|----------------------------------------------------------------------------------|------|------|-------|
| 5%                                                                               | P-O3 | L-O3 | L-CH4 |
| GFDL                                                                             | 69   | 29   | 41    |

|              |           |           |           |
|--------------|-----------|-----------|-----------|
| GISS         | 59        | 76        | 29        |
| GSFC         | 87        | 85        | 84        |
| GC           | 90        | 86        | 88        |
| NCAR         | 77        | 40        | 42        |
| UCI          | 92        | 85        | 84        |
| <i>U2015</i> | 89        | 83        | 84        |
| <i>U1997</i> | 88        | 82        | 81        |
| 10%          |           |           |           |
| GFDL         | 78        | 56        | 62        |
| GISS         | 71        | 83        | 33        |
| GSFC         | <b>90</b> | <b>91</b> | <b>90</b> |
| GC           | <b>93</b> | <b>92</b> | <b>91</b> |
| NCAR         | 81        | 54        | 56        |
| UCI          | <b>95</b> | <b>87</b> | <b>88</b> |
| <i>U2015</i> | 91        | 86        | 84        |
| <i>U1997</i> | 92        | 85        | 85        |
| 25%          |           |           |           |
| GFDL         | 90        | 71        | 78        |
| GISS         | 84        | 88        | 54        |
| GSFC         | 95        | 96        | 96        |
| GC           | 96        | 94        | 95        |
| NCAR         | 89        | 75        | 78        |
| UCI          | 97        | 95        | 95        |
| <i>U2015</i> | 96        | 92        | 92        |
| <i>U1997</i> | 96        | 92        | 93        |
| 50%          |           |           |           |
| GFDL         | 94        | 85        | 89        |
| GISS         | 89        | 97        | 82        |
| GSFC         | 95        | 99        | 99        |
| GC           | 98        | 98        | 99        |
| NCAR         | 95        | 89        | 92        |
| UCI          | 97        | 99        | 99        |
| <i>U2015</i> | 96        | 99        | 99        |
| <i>U1997</i> | 97        | 98        | 98        |

| <b>Table S8.</b> Overlap (%) of the top X% of Rs: 5 days vs 5d mean for each model |            |           |           |           |           |           |           |           |           |      |      |       |
|------------------------------------------------------------------------------------|------------|-----------|-----------|-----------|-----------|-----------|-----------|-----------|-----------|------|------|-------|
|                                                                                    | GSFC       |           |           | UCI       |           |           | GC        |           |           | NCAR |      |       |
|                                                                                    | P-O3       | L-O3      | L-CH4     | P-O3      | L-O3      | L-CH4     | P-O3      | L-O3      | L-CH4     | P-O3 | L-O3 | L-CH4 |
|                                                                                    | <b>5%</b>  |           |           |           |           |           |           |           |           |      |      |       |
| 08/01                                                                              | 83         | 76        | 75        | 90        | 84        | 83        | 88        | 83        | 86        | 79   | 50   | 47    |
| 08/06                                                                              | 85         | 80        | 78        | 90        | 84        | 82        | 88        | 83        | 87        | 76   | 47   | 50    |
| 08/11                                                                              | 85         | 74        | 63        | 90        | 83        | 72        | 91        | 88        | 89        | 81   | 64   | 53    |
| 08/16                                                                              | 82         | 81        | 81        | 92        | 85        | 83        | 89        | 82        | 87        | 84   | 68   | 54    |
| 08/21                                                                              | 80         | 67        | 67        | 91        | 80        | 75        | 88        | 75        | 76        | 75   | 55   | 49    |
|                                                                                    | <b>10%</b> |           |           |           |           |           |           |           |           |      |      |       |
| 08/01                                                                              | <b>88</b>  | <b>83</b> | <b>81</b> | <b>91</b> | <b>88</b> | <b>88</b> | <b>90</b> | <b>89</b> | <b>88</b> | 82   | 62   | 60    |
| 08/06                                                                              | <b>86</b>  | <b>88</b> | <b>86</b> | <b>91</b> | <b>88</b> | <b>88</b> | <b>90</b> | <b>87</b> | <b>89</b> | 83   | 58   | 60    |
| 08/11                                                                              | <b>87</b>  | <b>79</b> | <b>78</b> | <b>92</b> | <b>85</b> | <b>83</b> | <b>91</b> | <b>91</b> | <b>91</b> | 84   | 66   | 63    |
| 08/16                                                                              | <b>86</b>  | <b>84</b> | <b>85</b> | <b>92</b> | <b>89</b> | <b>87</b> | <b>92</b> | <b>91</b> | <b>91</b> | 85   | 72   | 67    |
| 08/21                                                                              | <b>85</b>  | <b>79</b> | <b>78</b> | <b>91</b> | <b>85</b> | <b>83</b> | <b>89</b> | <b>84</b> | <b>83</b> | 81   | 62   | 64    |
|                                                                                    | <b>25%</b> |           |           |           |           |           |           |           |           |      |      |       |
| 08/01                                                                              | 87         | 89        | 91        | 94        | 92        | 92        | 95        | 89        | 89        | 90   | 83   | 84    |

|       |            |    |    |    |    |    |    |    |    |    |    |    |
|-------|------------|----|----|----|----|----|----|----|----|----|----|----|
| 08/06 | 90         | 93 | 93 | 96 | 93 | 93 | 95 | 93 | 93 | 90 | 76 | 80 |
| 08/11 | 90         | 93 | 93 | 94 | 92 | 92 | 95 | 92 | 94 | 90 | 81 | 84 |
| 08/16 | 90         | 94 | 94 | 97 | 94 | 94 | 95 | 93 | 94 | 91 | 83 | 85 |
| 08/21 | 87         | 93 | 93 | 93 | 92 | 91 | 94 | 90 | 89 | 87 | 75 | 79 |
|       | <b>50%</b> |    |    |    |    |    |    |    |    |    |    |    |
| 08/01 | 95         | 99 | 98 | 97 | 98 | 98 | 97 | 97 | 97 | 95 | 93 | 95 |
| 08/06 | 93         | 99 | 98 | 98 | 97 | 97 | 98 | 98 | 98 | 94 | 92 | 93 |
| 08/11 | 94         | 99 | 98 | 98 | 99 | 99 | 97 | 98 | 98 | 96 | 93 | 94 |
| 08/16 | 93         | 98 | 97 | 98 | 99 | 99 | 97 | 98 | 98 | 96 | 92 | 93 |
| 08/21 | 94         | 98 | 98 | 97 | 98 | 98 | 97 | 98 | 98 | 94 | 90 | 92 |

**Table S9.** Average and RMS parcel differences for several UCI sensitivity studies. for some case the reference is a 5-day simulation and for others it is a single day (8/16).

| model                  | average difference |               |                |                 |                 | rms difference |               |                |                 |                 |
|------------------------|--------------------|---------------|----------------|-----------------|-----------------|----------------|---------------|----------------|-----------------|-----------------|
|                        | P-O3<br>ppb/d      | L-O3<br>ppb/d | L-CH4<br>ppb/d | J-NO2<br>e-3 /s | J-O1D<br>e-5 /s | P-O3<br>ppb/d  | L-O3<br>ppb/d | L-CH4<br>ppb/d | J-NO2<br>e-3 /s | J-O1D<br>e-5 /s |
| <i>UCI 2016 5 days</i> | 0.827              | 1.467         | 0.648          | 4.705           | 1.224           |                |               |                |                 |                 |
| UCI 2015               | 0.006              | 0.007         | 0.003          | 0.020           | 0.003           | 0.056          | 0.123         | 0.058          | 0.329           | 0.077           |
| UCI 1997               | 0.006              | 0.004         | 0.001          | 0.019           | 0.007           | 0.057          | 0.121         | 0.057          | 0.334           | 0.082           |
| fixed solar declin.    | 0.000              | 0.000         | 0.001          | 0.002           | 0.000           | 0.003          | 0.007         | 0.003          | 0.014           | 0.005           |
| different restart      | 0.000              | 0.000         | 0.000          | 0.000           | 0.000           | 0.006          | 0.002         | 0.002          | 0.000           | 0.000           |
| <i>UCI 2016 08/16</i>  | 0.835              | 1.492         | 0.660          | 4.800           | 1.239           |                |               |                |                 |                 |
| initialize at 1200H    | 0.010              | 0.015         | 0.003          | 0               | 0               | 0.030          | 0.017         | 0.006          | 0.003           | 0.001           |
| + GFDL T               | 0.005              | -0.001        | -0.001         | -0.001          | 0.000           | 0.070          | 0.050         | 0.049          | 0.015           | 0.018           |
| + GFDL T&q             | 0.013              | -0.011        | -0.009         | -0.001          | 0.000           | 0.126          | 0.845         | 0.297          | 0.015           | 0.018           |
| + NCAR T               | 0.032              | 0.015         | 0.014          | 0.002           | 0.004           | 0.138          | 0.076         | 0.074          | 0.019           | 0.022           |
| + NCAR T&q             | 0.048              | 0.165         | 0.061          | 0.002           | 0.004           | 0.198          | 0.989         | 0.364          | 0.019           | 0.022           |

**Table S10.** Differences between modeled and specified T&q over the 5 days

| model                                       | GFDL  | NCAR  |
|---------------------------------------------|-------|-------|
| mean T (K)                                  | -0.11 | +0.17 |
| rms T (K)                                   | 3.46  | 3.69  |
| mean log <sub>10</sub> [q (g/kq)]           | -0.02 | +0.01 |
| rms log <sub>10</sub> [q (g/kq)]            | 0.39  | 0.41  |
| The other 4 models used the data stream T&q |       |       |



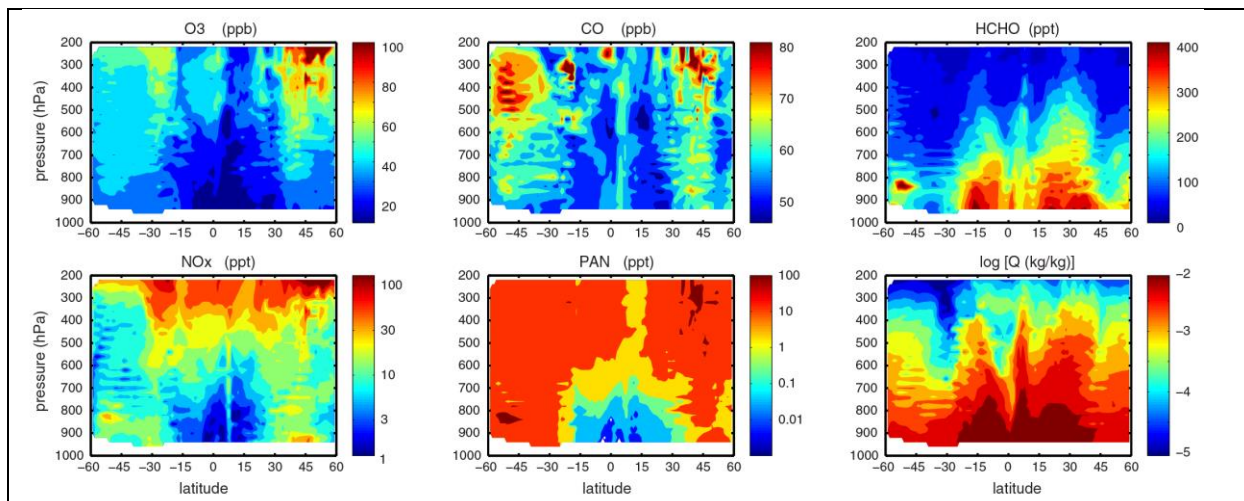

Figure S1. Latitude by pressure plots of 6 key species from the data stream used in this study. The data stream was taken from an older version of the UCI CTM running at a grid resolution 640x320 with about 30 layers in the troposphere. Sampling was only for 0.5 to 12 km (960 to 200 hPa).

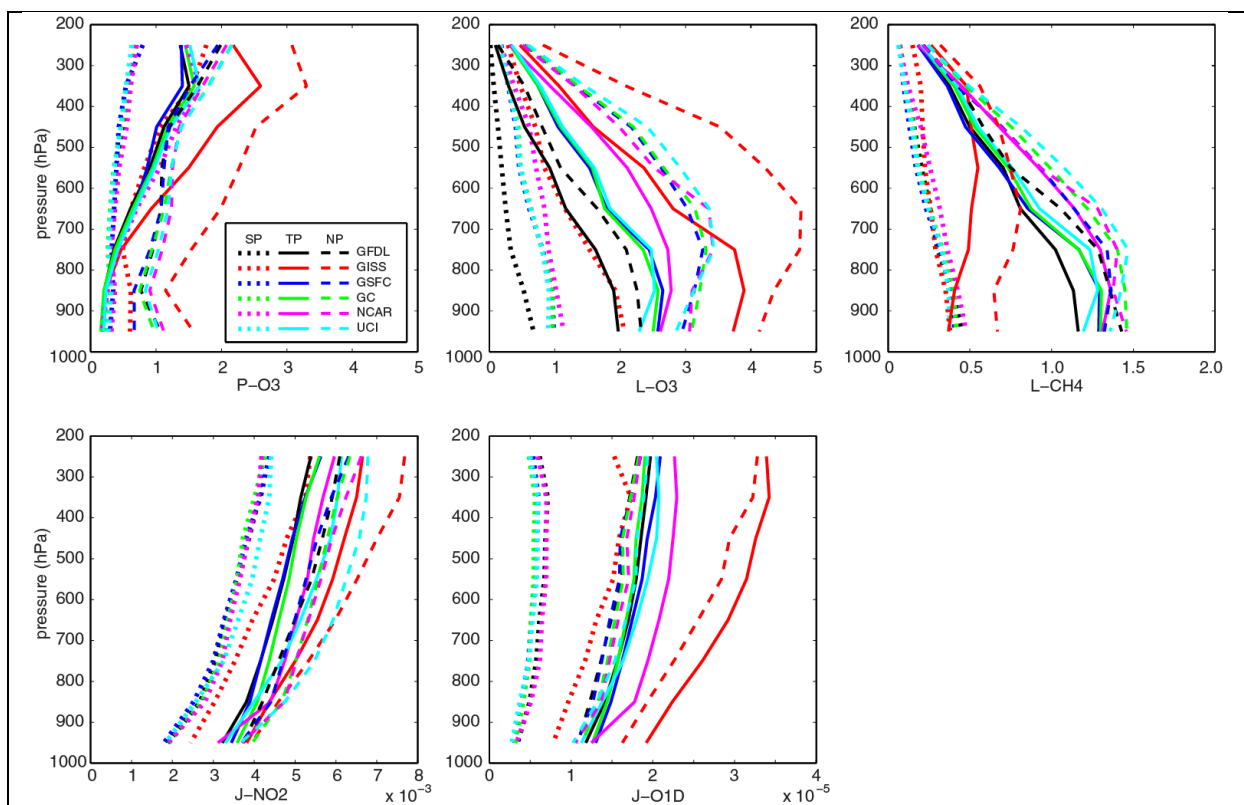

Figure S2. Different models' profiles of reactivities (a, P-O<sub>3</sub>; b, L-O<sub>3</sub>; c, L-CH<sub>4</sub>; all ppb/day) and photolysis rates (d, J-NO<sub>2</sub>; e, J-O<sub>1</sub>D; all /sec) calculated for the data stream of 14,880 air parcels. Models are identified by color (black, GFDL; red, GISS; blue, GSFC; green, GC; magenta, NCAR; cyan, UCI). Latitude bands are identified by line style (solid, 20S-20N; dotted, 50S-20S; dashed, 20N-50N). Averages are over the 5 simulated dates in August and all parcels are weighted equally.

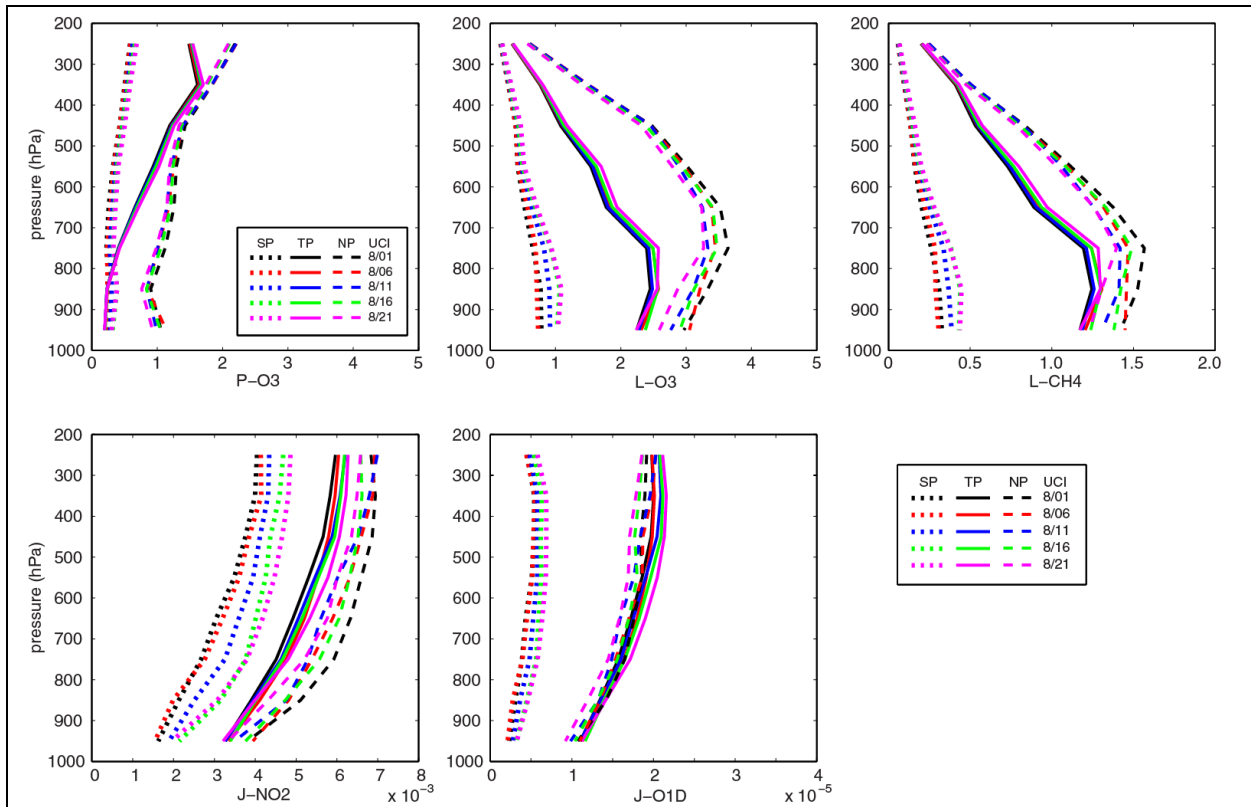

Figure S3. 5 August days of UCI modeled profiles of reactivities (a, P-O<sub>3</sub>; b, L-O<sub>3</sub>; c, L-CH<sub>4</sub>; all ppb/day) and photolysis rates (d, J-NO<sub>2</sub>; e, J-O<sub>1</sub>D; all /sec) calculated for the data stream of 14,880 air parcels. Dates are identified by color (black, 08/01; red, 08/06; blue, 08/11; green, 08/16; magenta, 08/21). Latitude bands are identified by line style (solid, 20S-20N; dotted, 50S-20S; dashed, 20N-50N). All parcels are weighted equally.

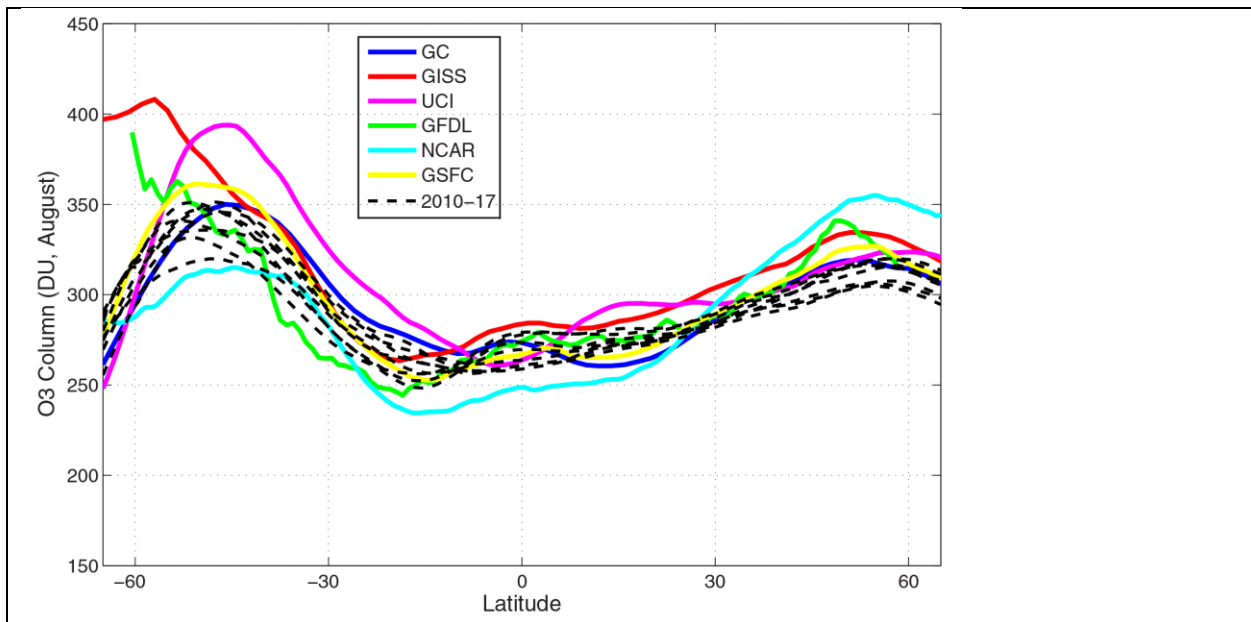

Figure S4. Total O<sub>3</sub> columns (DU, August zonal mean) from the models (thick colored lines) and Aura OMI observations (2010-2017, thin black lines). N.B. AM3 is just from 5-day mean of ATom-sim points at dateline.

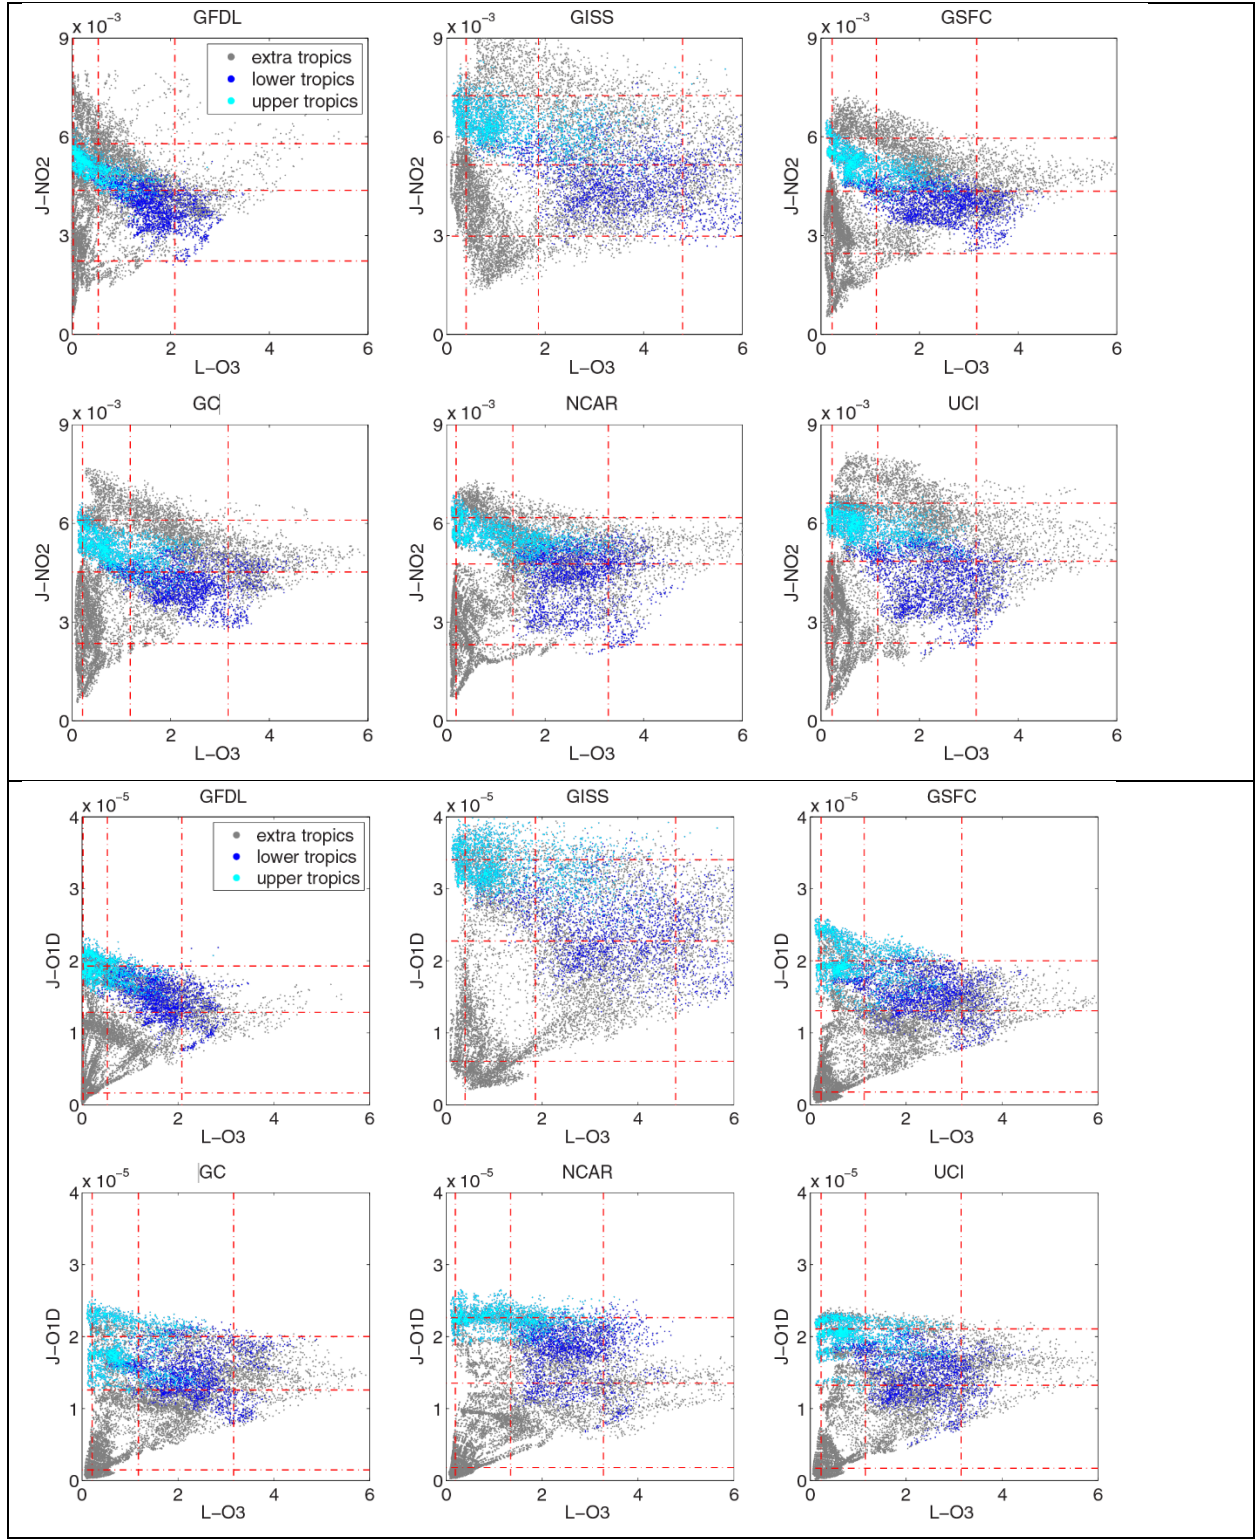

Figure S5. Parcel values of (top) J-NO2 and (bottom) J-O1D vs. L-O3 for each of the models. See Figure 1.

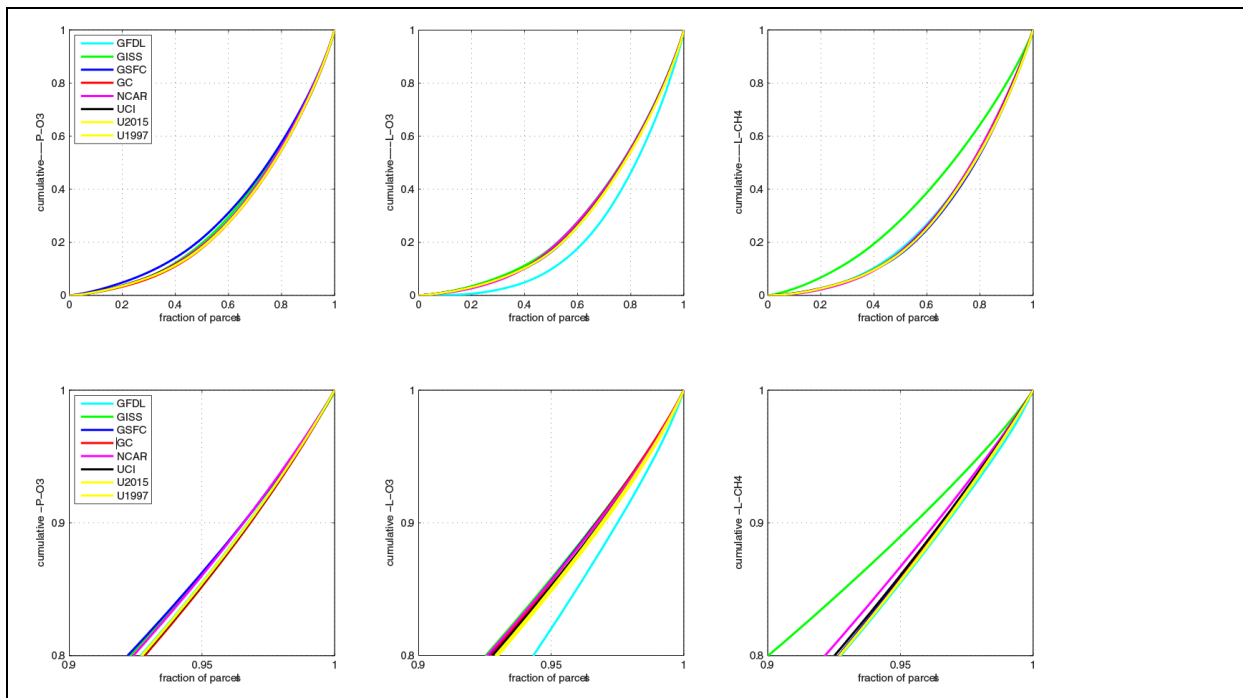

Figure S6. Cumulative reactivity of the 14,880 parcels (equally weighted) scaled to the average of each model and reactivity. The lower panel shows a blowup of the top 20% (Cumulative = 0.8 to 1.0). Results for the 6 models plus two different years for UCI are shown.

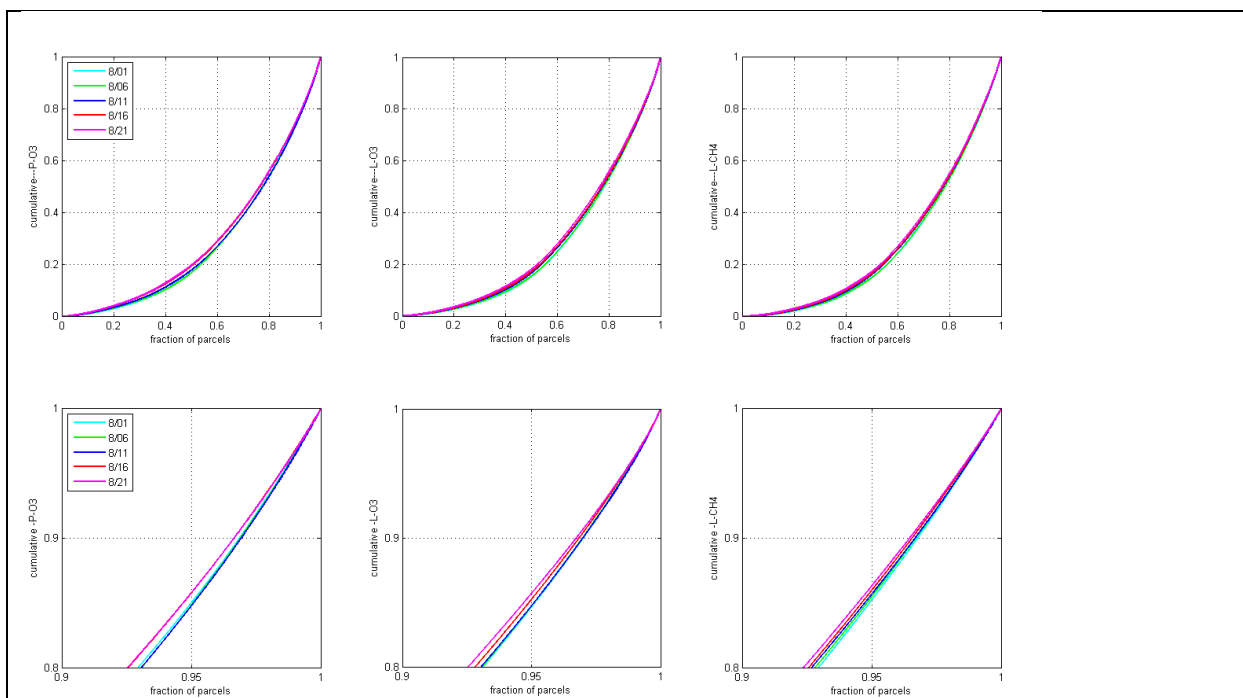

Figure S7. Cumulative reactivity of the 14,880 parcels (equally weighted) scaled to the average of each model day and reactivity. The lower panel shows a blowup of the top 20% (Cumulative = 0.8 to 1.0). Results for the 5 days in August for UCI.

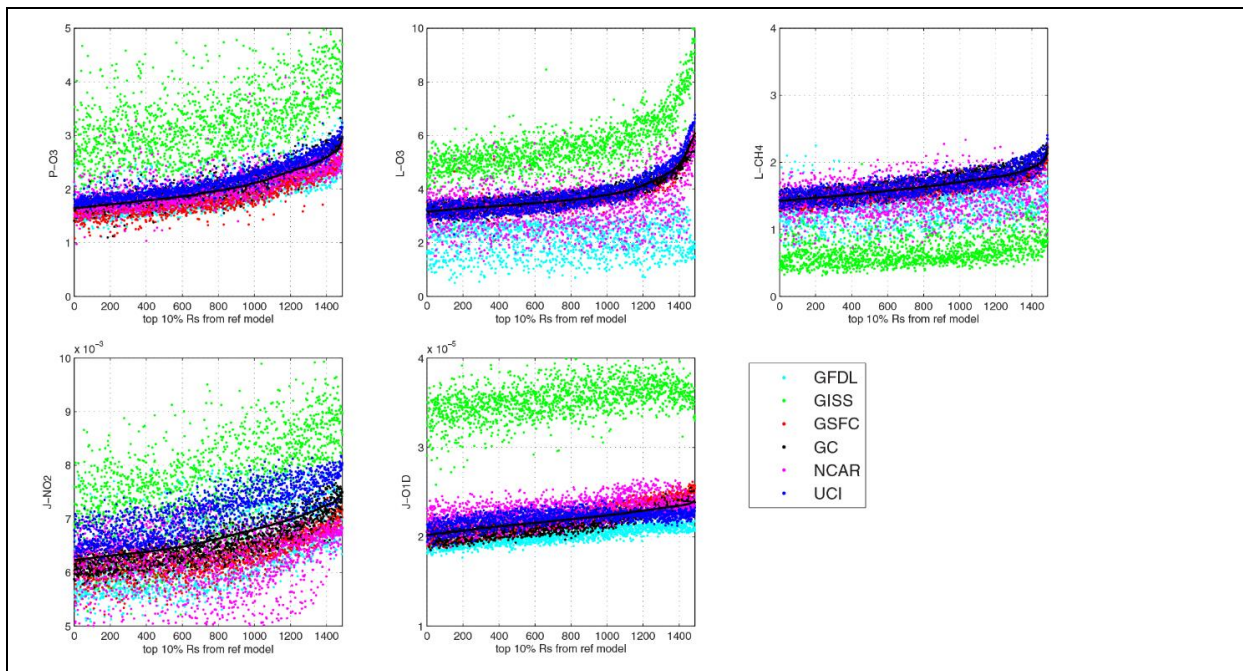

Figure S8. Modeled Reactivity and J-values for 5-day mean parcels plotted using the top-10% in the reference case in ascending order along the X axis. The black dashed monotonically increasing line is the reference case parcels.

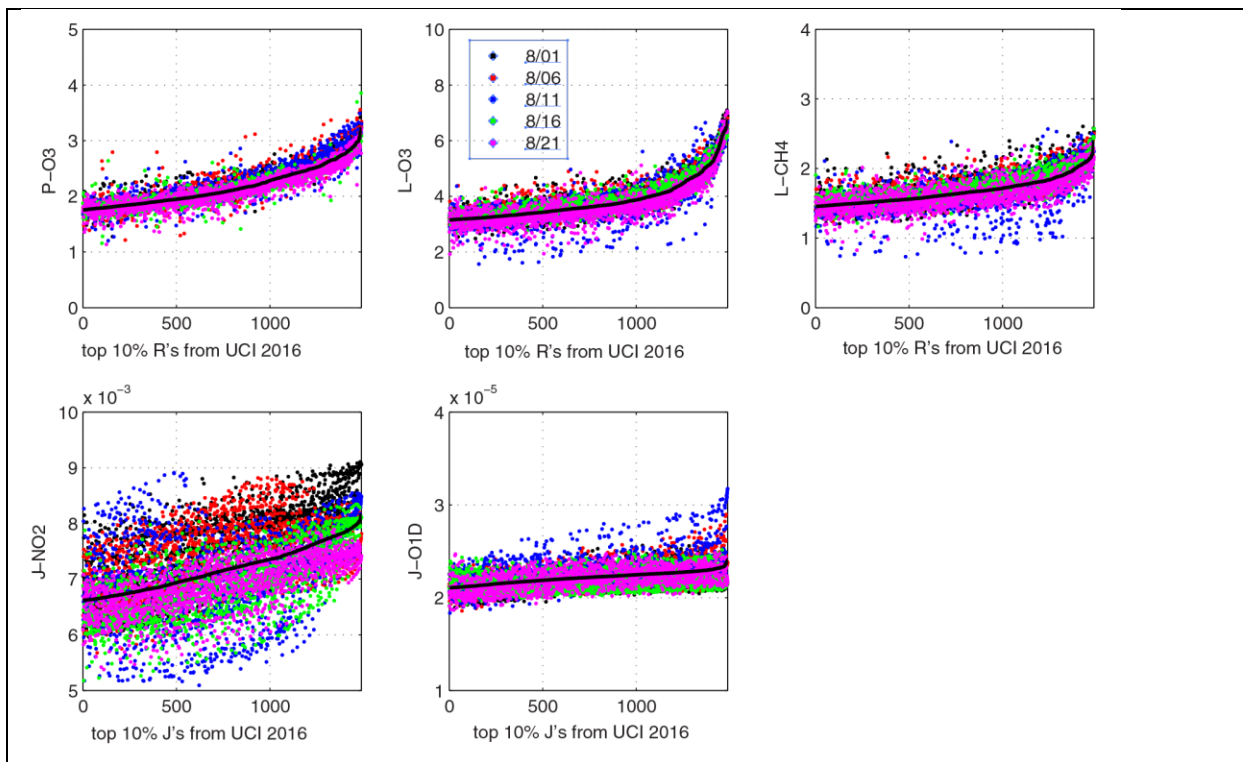

Figure S9. Modeled Reactivity and J-values of the top-10% parcels for 5 separate days for UCI, sorted by and plotted against the 5-day mean (black line). See figure S8.

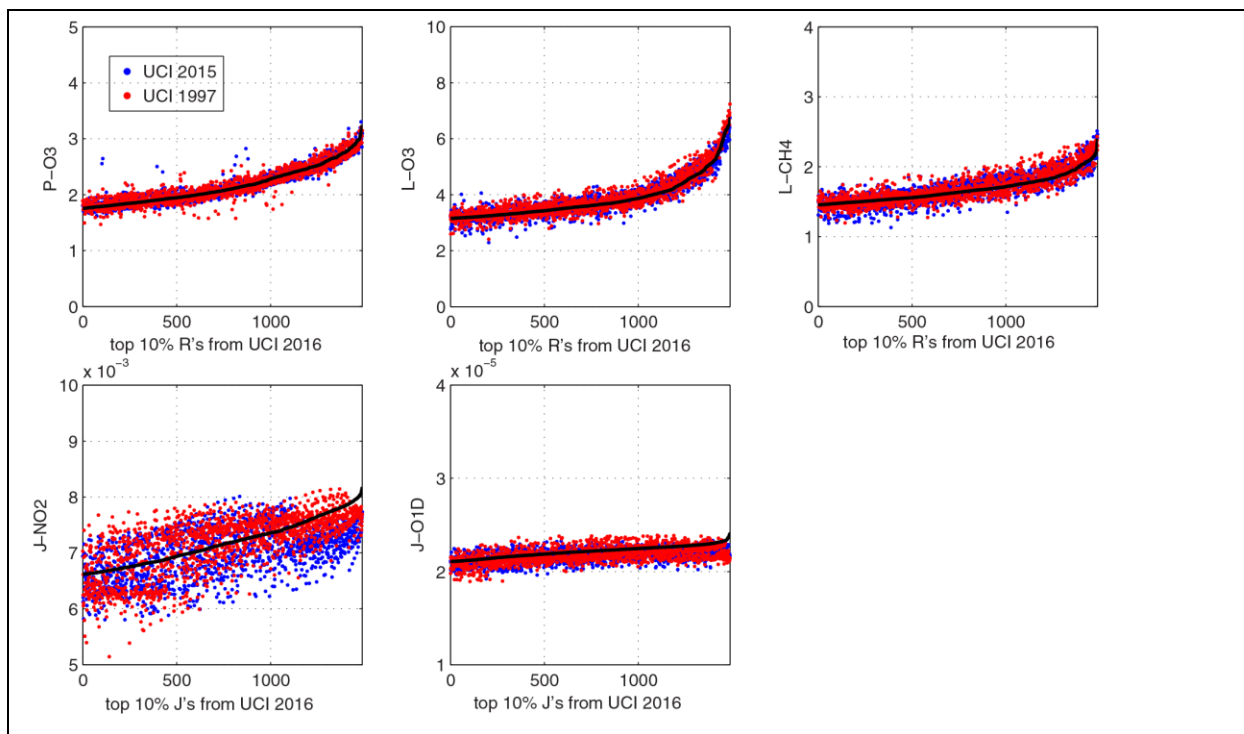

Figure S10. Modeled Reactivity and J-values of the top-10% parcels (all 5-day means) from two different years with UCI (1997, 2015), sorted by and plotted against the standard UCI model (year 2016, black line). See figure S8.

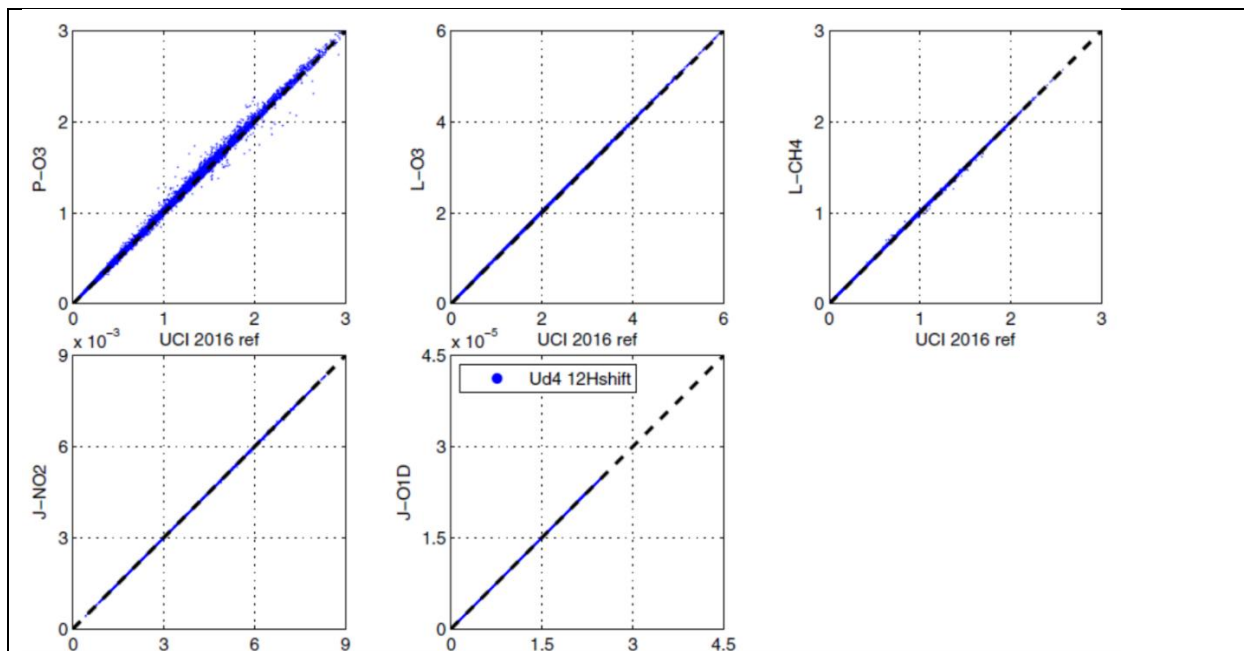

Figure S11. Scatter plot of reactivities and J-values for 8/16 air parcels from the UCI model initiating the calculation at 0000H instead of 1200H, but maintaining the same cloud fields.

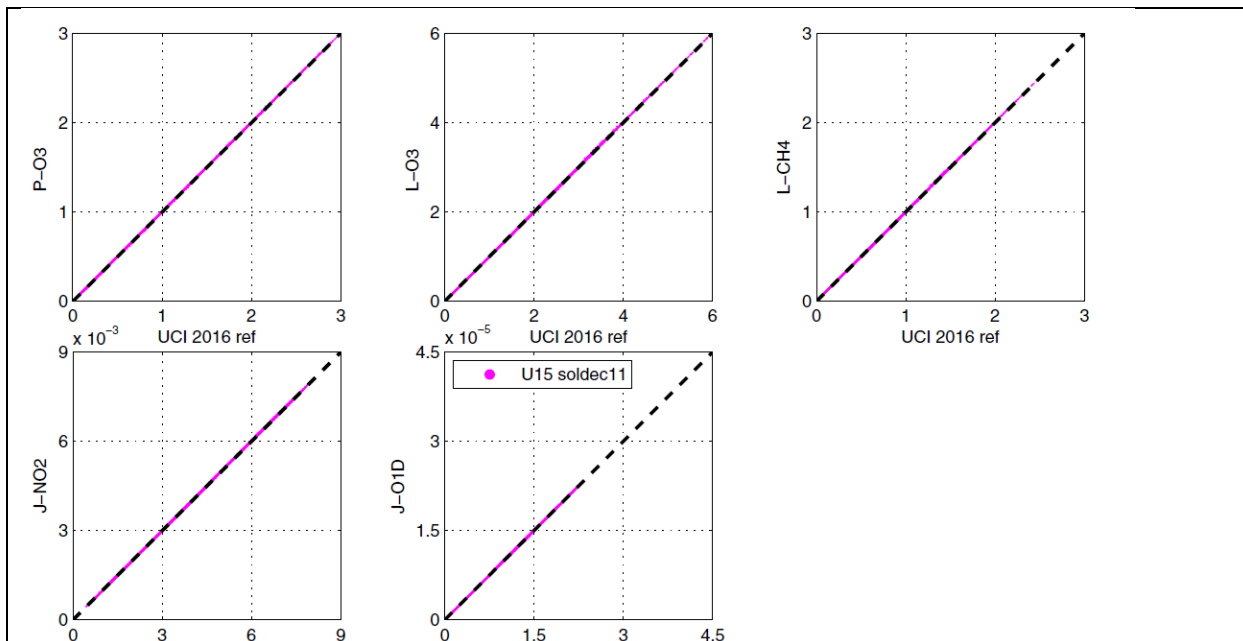

Figure S12. Scatter plot of reactivities and J-values for 5d-mean air parcels from the UCI model holding the solar declination fixed over the 5 days: 8/01, 8/06, 8/11, 8/16, 8/21.

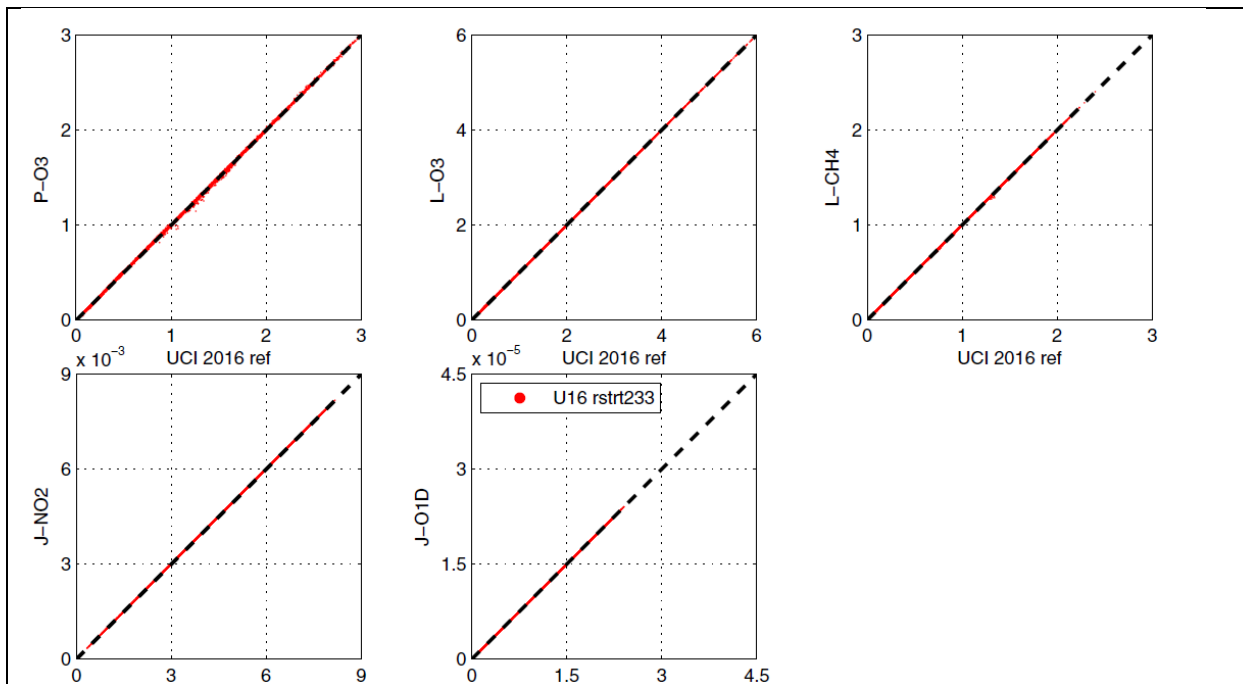

Figure S13. Scatter plot of reactivities and J-values for 5d-mean air parcels from the UCI model using a different restart file (but with the same data stream parcels).

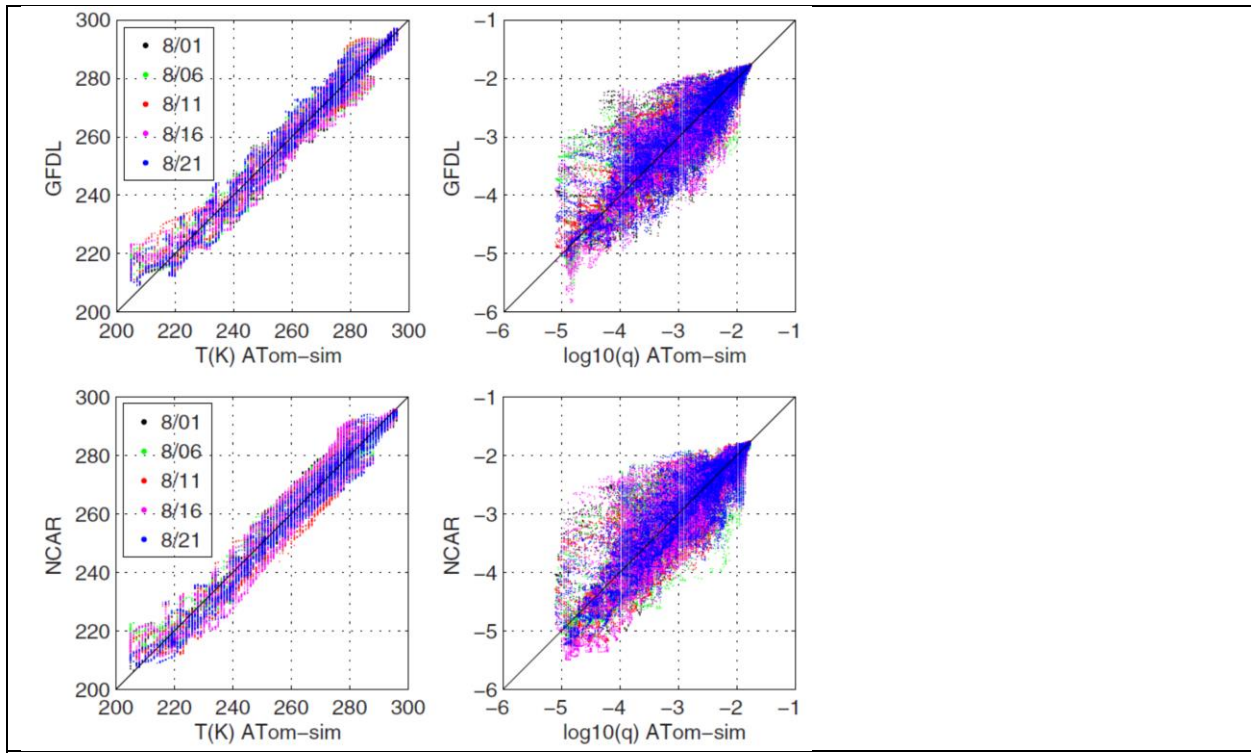

Figure S14. Scatter plot of the GFDL and NCAR T&q values used in their calculations vs the specified data stream for the 14,880 parcels.
